# Supplementary material for: A preoperative model for predicting microvascular invasion and assisting in prognostic stratification in liver transplantation for HCC regarding empirical criteria
Source: PubMed Central journal article supplement — Transl Oncol. 2021 Aug 13;14(11):101200. doi: 10.1016/j.tranon.2021.101200 (PMC8367829; doi:10.1016/j.tranon.2021.101200), 2021-08-13
Supplement: mmc2.pdf [file mmc2.pdf]

This document certifies that the manuscript

## **A preoperative model for predicting MVI and assisting in prognostic stratification in liver transplantation for HCC regarding empirical criteria**

prepared by the authors

**Wenhui Zhang, Zhikun Liu, Junli Chen, Siyi Dong, Beini Cen, Shusen Zheng,...**

was edited for proper English language, grammar, punctuation, spelling, and overall style by one or more of the highly qualified native English speaking editors at AJE.

This certificate was issued on **October 23, 2020** and may be verified on the [AJE website](#) using the verification code **60D3-B6F3-0867-DAFA-D8F4**.

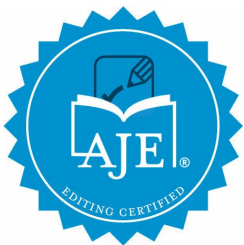

Neither the research content nor the authors' intentions were altered in any way during the editing process. Documents receiving this certification should be English-ready for publication; however, the author has the ability to accept or reject our suggestions and changes. To verify the final AJE edited version, please visit our verification page at [aje.com/certificate](#). If you have any questions or concerns about this edited document, please contact AJE at [support@aje.com](mailto:support@aje.com).
